# Supplementary material
Source: PubMed Central journal article supplement (PMC3271370)
Supplement: Supp_Data.pdf [file Supp_Data.pdf]

## Supplementary Data

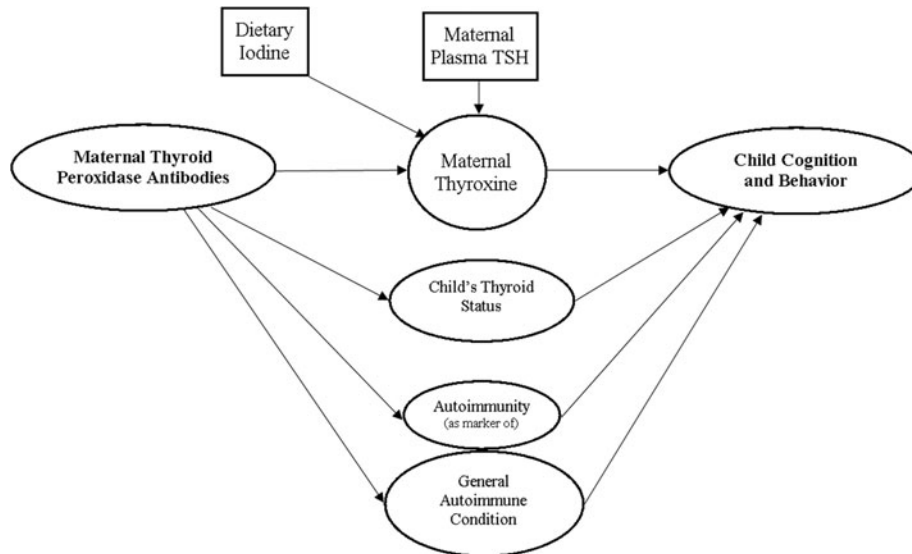

SUPPLEMENTARY FIG. S1. Theoretical model of the role of thyroid autoimmunity in child's problem behavior.
